# Supplementary material
Source: ML conference proceedings conference paper supplement (https://proceedings.neurips.cc/paper_files/paper/2023/hash/bf3ee5a5422b0e2a88b0c9c6ed3b6144-Abstract.html)
Supplement: Supplementary file 1 [file bf3ee5a5422b0e2a88b0c9c6ed3b6144-Supplemental-Conference.zip]

Archive with 1 entries (1 files):
- supplementary_material/appendix.pdf
